# Supplementary material for: Structural Evidence for the Substrate Channeling of Rice Allene Oxide Cyclase in Biologically Analogous Nazarov Reaction
Source: Front Chem. 2018 Oct 30;6:500. doi: 10.3389/fchem.2018.00500 (PMC6218421; doi:10.3389/fchem.2018.00500)
Supplement: Supplementary file 1 [file Data_Sheet_1.zip › Data Sheet 1.PDF]

## SUPPLEMENTARY MATERIALS

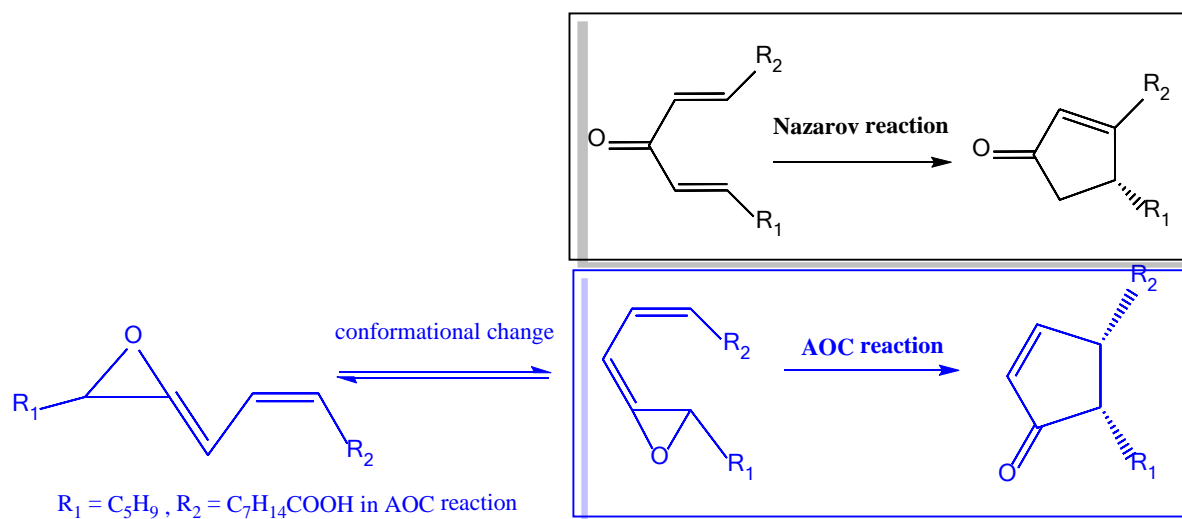

**Figure S1.** Formation of cyclopentenone in Nazarov (black) and AOC (blue) reactions.  $R_1 = \text{C}_5\text{H}_9$ ,  $R_2 = \text{C}_7\text{H}_{14}\text{COOH}$  in AOC reaction.

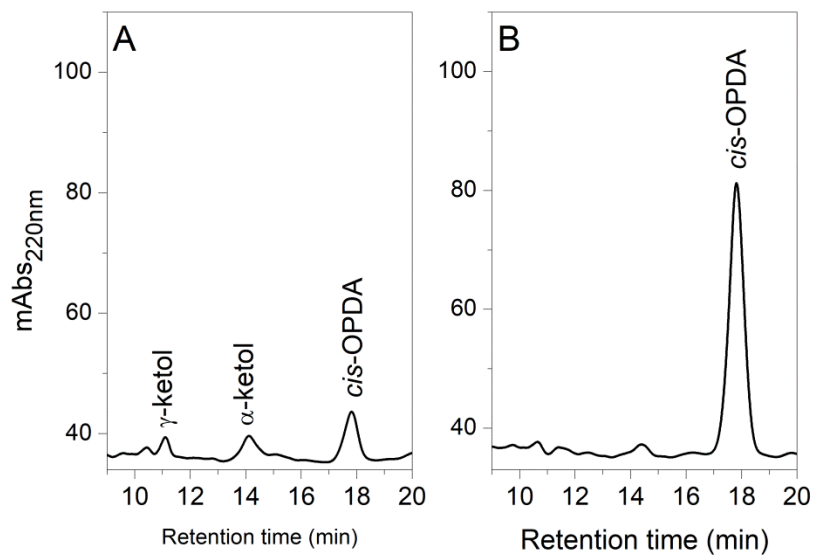

**Figure S2.** RP-HPLC analysis of OsAOC(I) reaction products. The reaction mixtures were injected directly onto reverse phase HPLC. **(A)** Non cyclization products of allene oxide, 12,13-EOT. The allene oxide was non-enzymatically converted into ketols and a racemic mixture of *cis*( $\pm$ )-OPDA in the absence of OsAOC. **(B)** Enzymatic cyclization product of OsAOC. Formation of *cis*-OPDA increased remarkably in the presence of OsAOC.

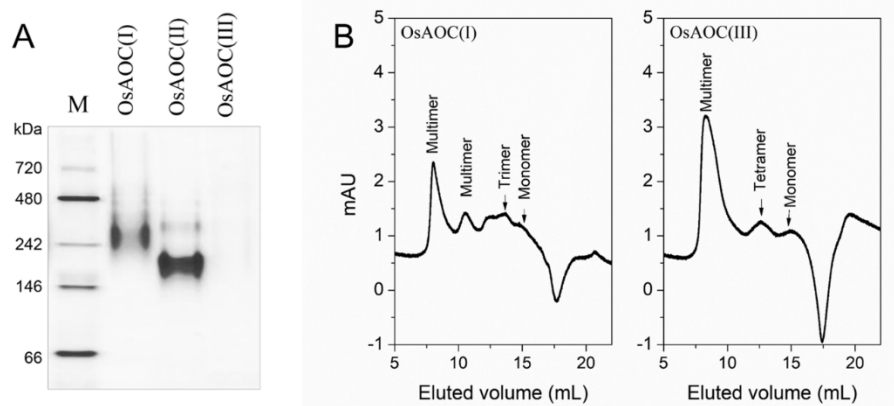

**Figure S3.** Analysis of oligomeric structures of OsAOC **(A)** Native PAGE Analysis. The recombinant proteins ( $\sim 4 \mu\text{g}$ ) were loaded into a native gel composed of 5% stacking and the 6–15% gradient separating gels. The full-length OsAOC(III) could not migrate into the gel. **(B)** Gel filtration analysis. Molecular weight (MW) standards are void (blue dextran),  $\beta$ -amylase (200 kDa), BSA (66 kDa), ovalbumin (44 kDa), carbonic anhydrase (29 kDa), and cytochrome C (12.4 kDa). The molecular size was determined from a plot of log molecular size ( $x$ ) versus  $K_{av}(y) = (V_e - V_o)/(V_t - V_o)$  and the data were fitted by linear regression where the coefficient of determination,  $r^2 = 0.94307$ , to the equation:  $y = -0.49254x + 3.26545$ .

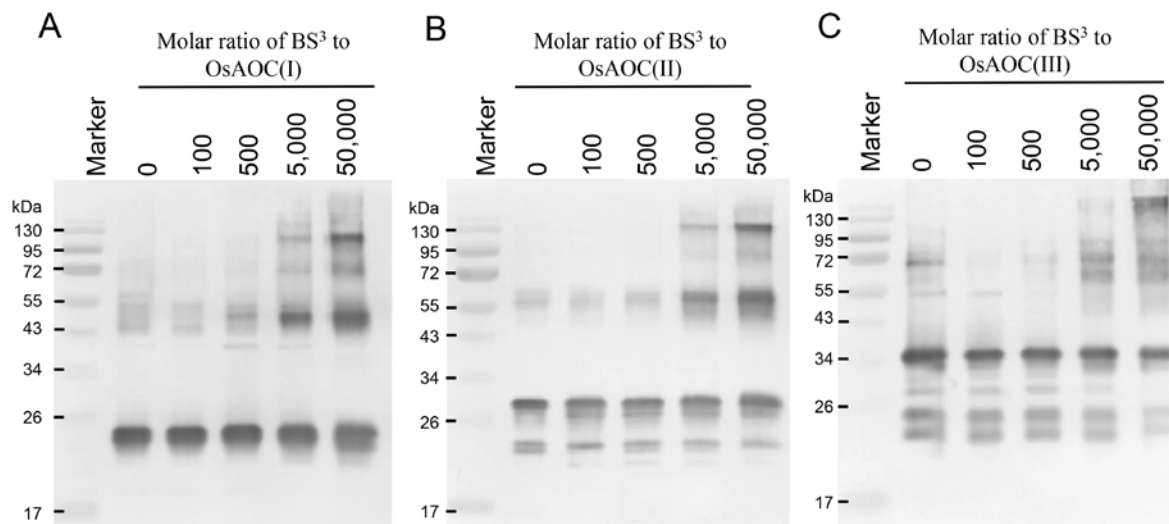

**Figure S4.** Western blot analysis of the cross-linked OsAOC. **(A)** OsAOC(I), **(B)** OsAOC(II), **(C)** OsAOC(III). The 100-fold diluted proteins were cross-linked with BS<sup>3</sup> as described in Figure 5. Reaction mixtures containing  $\approx 13$  ng OsAOC variant were analyzed by 15% SDS-PAGE.

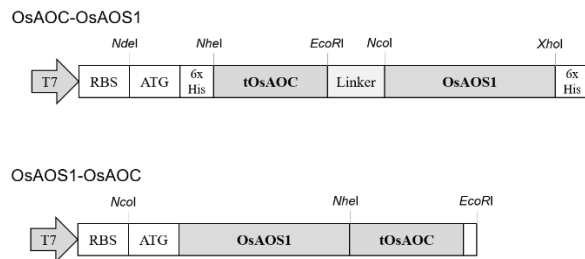

**Figure S5.** Plasmid constructs for OsAOC/OsAOS1 fusion proteins. OsAOC-OsAOS1: OsAOC lies N-terminal to OsAOS1. OsAOS1-OsAOC: OsAOS1 lies N-terminal to OsAOC.

A

|             |                                                              |     |
|-------------|--------------------------------------------------------------|-----|
| OsAOC (I)   | MRGSHHHHHHGM-----                                            | 12  |
| OsAOC (II)  | MRGSHHHHHHGMASMTGGQQMGRDLYDDDDKDPSSRSAAGTM-----              | 42  |
| OsAOC (III) | MRGSHHHHHHGMASMTGGQQMGRDLYDDDDKDPSSRSAAGTMAAAAPSRVSVRAAAPGQT | 60  |
| OsAOC (I)   | -----ASLFSPKPATPKDARPAKVQEMFVYEINER                          | 42  |
| OsAOC (II)  | -----ASLFSPKPATPKDARPAKVQEMFVYEINER                          | 72  |
| OsAOC (III) | GGFAKIRPQVVVAAAARSAGVSGRRARSVRASLFSPKPATPKDARPAKVQEMFVYEINER | 120 |
| OsAOC (I)   | DRESPAYLRLSAQQTENALGDLVPFTNKLYSGSLDKRLGISAGICILIQHVPERNGDRYE | 102 |
| OsAOC (II)  | DRESPAYLRLSAQQTENALGDLVPFTNKLYSGSLDKRLGISAGICILIQHVPERNGDRYE | 132 |
| OsAOC (III) | DRESPAYLRLSAQQTENALGDLVPFTNKLYSGSLDKRLGISAGICILIQHVPERNGDRYE | 180 |
| OsAOC (I)   | AIYSFYFGDYGHISVQGPYLTYEESYLAVTGGSGVFEGAYGQVKLNQIVFPFKIFYTFYL | 162 |
| OsAOC (II)  | AIYSFYFGDYGHISVQGPYLTYEESYLAVTGGSGVFEGAYGQVKLNQIVFPFKIFYTFYL | 192 |
| OsAOC (III) | AIYSFYFGDYGHISVQGPYLTYEESYLAVTGGSGVFEGAYGQVKLNQIVFPFKIFYTFYL | 240 |
| OsAOC (I)   | KGIPDLPRELLCTPVPPSPTVEPTPAAKATEPHACLNNFTN                    | 203 |
| OsAOC (II)  | KGIPDLPRELLCTPVPPSPTVEPTPAAKATEPHACLNNFTN                    | 233 |
| OsAOC (III) | KGIPDLPRELLCTPVPPSPTVEPTPAAKATEPHACLNNFTN                    | 281 |

B

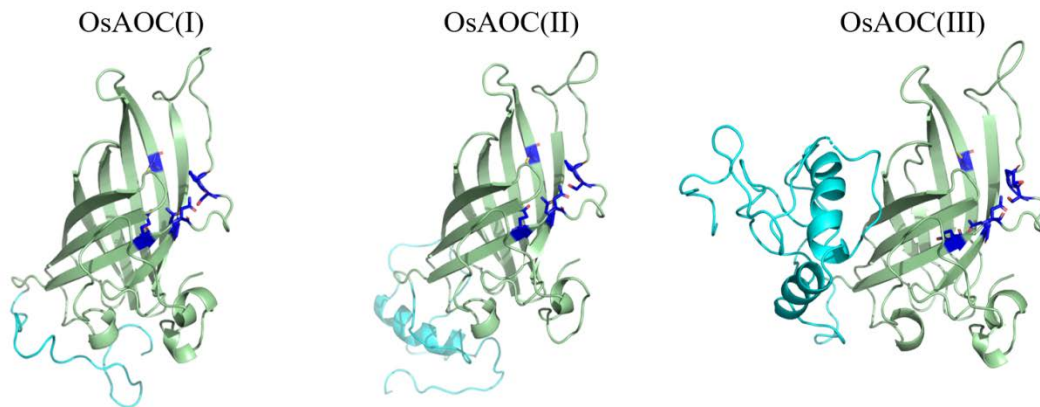

**Figure S6.** Structural modeling of protomeric OsAOC variants. **(A)** Sequences of N-terminal region of OsAOC variants. **(B)** Structures of protomers of OsAOC variants. Amino acid sequences of OsAOC(I), OsAOC(II), OSAOC(III) were used as input for intensive mode of Phyre<sup>2</sup> (<http://www.sbg.bio.ic.ac.uk/phyre2/>) and protomer structure was generated. Light blue (cyan) indicates the part removed in SWISS-Model-generated structure of AtAOC2 (see text). Blue denotes OsAOC active site amino acid residues that play critical roles during catalysis.
